# Supplementary material for: Aberrant JAK/STAT Signaling Suppresses TFF1 and TFF2 through Epigenetic Silencing of GATA6 in Gastric Cancer
Source: MDPI journal article supplement (doi:10.3390/ijms17091467), 2016-09-02
Supplement: s1 [file s1]

# Supplementary Materials: Aberrant JAK/STAT Signaling Suppresses TFF1 and TFF2 through Epigenetic Silencing of GATA6 in Gastric Cancer

Cheng-Shyong Wu, Kuo-Liang Wei, Jian-Liang Chou, Chung-Kuang Lu, Ching-Chuan Hsieh, Jora M. J. Lin, Yi-Fang Deng, Wan-Ting Hsu, Hui-Min David Wang, Chung-Hang Leung, Dik-Lung Ma, Chin Li and Michael W. Y. Chan

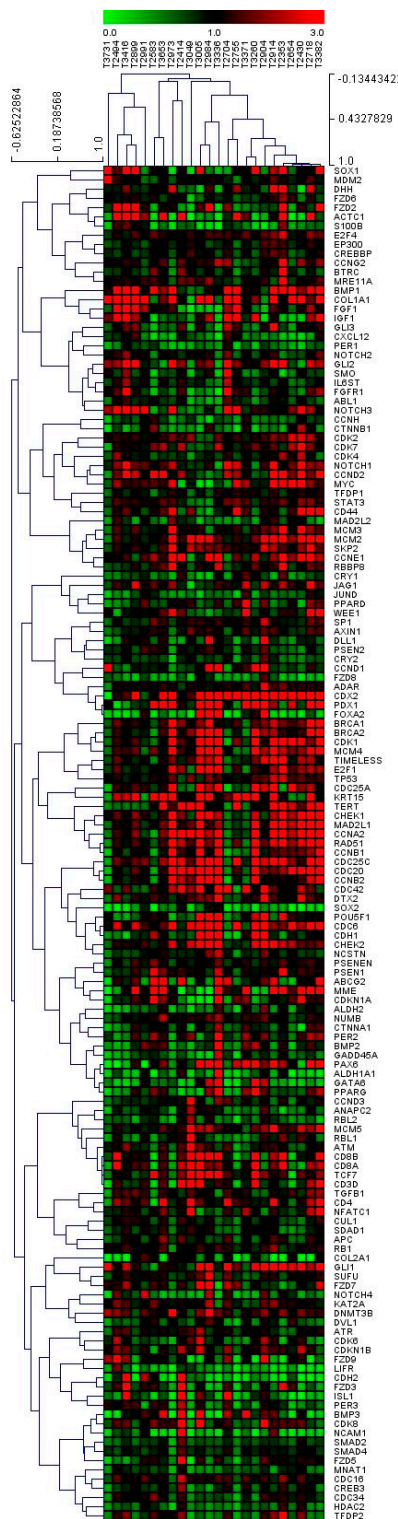

Figure S1. High resolution heatmap image of Figure 1A.

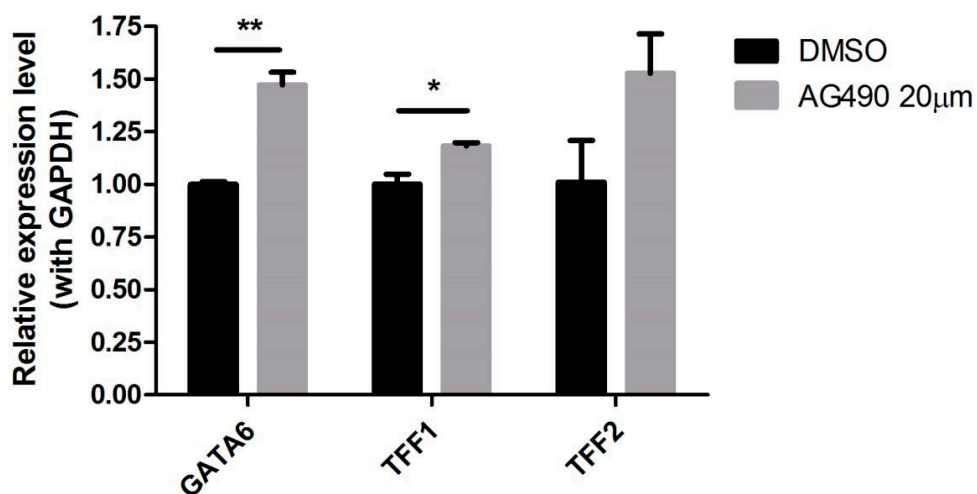

**Figure S2.** Treatment with AG490 restored the expression of GATA6 and trefoil factors (TFF) 1 and 2 in AGS cells. Cells were treated with 20 μm of AG490 for 24 h and then harvested for RNA isolation and qRT-PCR analysis. \*\*  $p < 0.01$ , \*  $p > 0.05$ . GAPDH: glyceraldehyde 3-phosphate dehydrogenase; DMSO: dimethyl sulfoxide.
